# Supplementary material for: Li–air battery and ORR activity of nanocarbons produced with good synthesis rate by solution plasma process
Source: Royal Society of Chemistry journal article supplement (doi:10.1039/d0ma00926a), 2021-01-01
Supplement: d0ma00926a1.pdf [file d0ma00926a1.pdf]

## Supporting Information

---

### Li-air battery and ORR activity of nanocarbons produced on synthesis rate by solution plasma process

Md. Zahidul Islam,<sup>a</sup> Anyarat Watthanaphanit,<sup>b</sup> Sangwoo Chae,<sup>a</sup> and Nagahiro Saito,<sup>a,c,d,e,\*</sup>

<sup>a</sup> Department of Chemical Systems Engineering, Graduate School of Engineering, Nagoya University, Nagoya 464-8603, Japan

<sup>b</sup> Department of Chemistry, Faculty of Science, Mahidol University, 272 Thanon Rama VI, Thung Phaya Thai, Ratchathewi, Bangkok 10400, Thailand

<sup>c</sup> Japan Research for Evolutional Science and Technology (CREST), Japan Science and Technology Agency (JST), Kawaguchi, Saitama 332-0012, Japan

<sup>d</sup> *Institutes for Innovation for Future Society, Nagoya University, Nagoya 464-8603, Japan*

<sup>e</sup> *Conjoint Research Laboratory in Nagoya University, Shinshu University, Furo-cho, Chikusa, Nagoya 464-8603, Japan*

#### Corresponding author

E-mail: hiro@rd.numse.nagoya-u.ac.jp

Telephone: +81-52-789-3259

### Benzene conversion pathway is polymerization by SPP

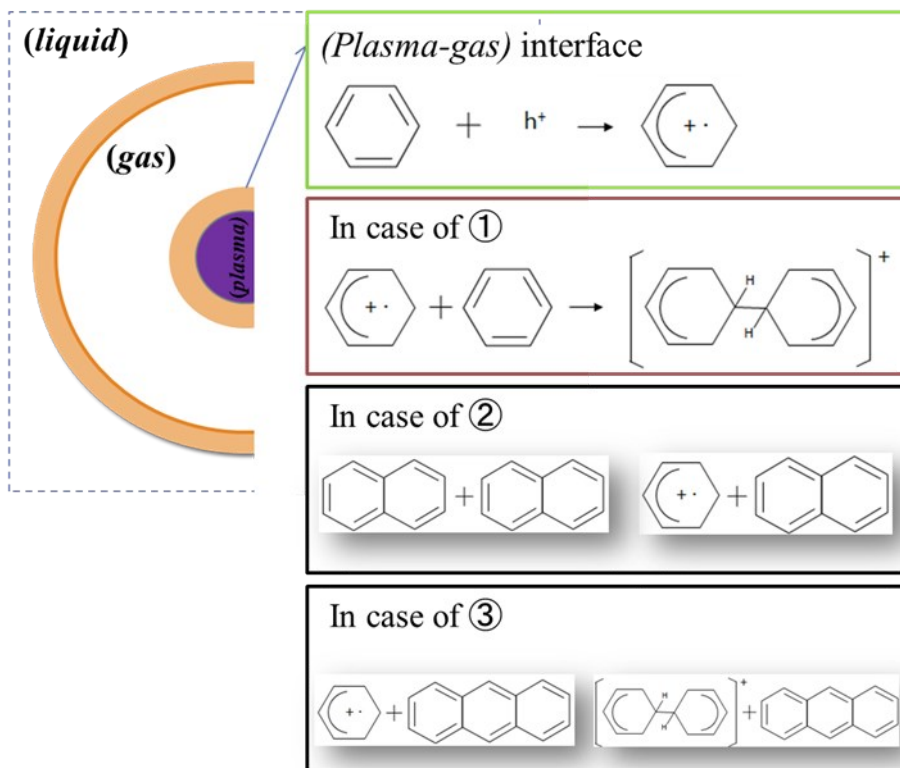

Fig. S1. Schematic of nanocarbon formation from BZ using SPP.

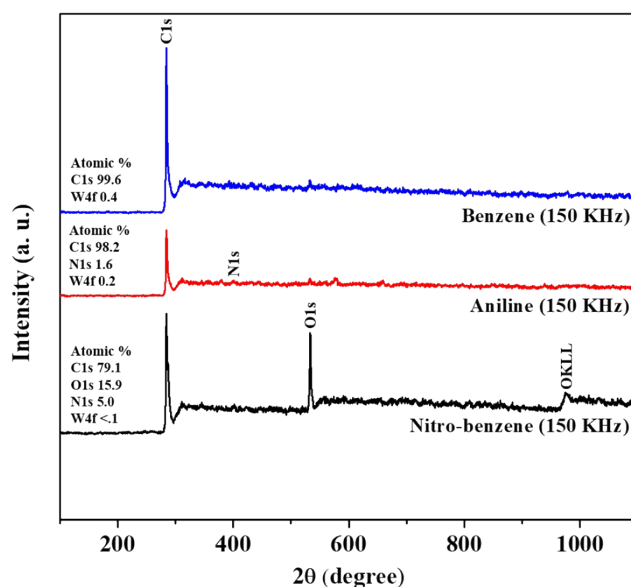

Fig. S2 XPS elemental compositions (% atom) of nanocarbons of BZ, BZ-NH<sub>2</sub> and BZ-NO<sub>2</sub>

**Table S1.** The carbon yield (%) and synthesis rate are calculated from the carbon powder

| Conditions                           | Carbon Powder, M (mg) | Synthesis rate, R (mg/min) | Carbon yield, Y (%) |
|--------------------------------------|-----------------------|----------------------------|---------------------|
| BZ (50 KHz, 0.5 μs)                  | 1260                  | 42                         | 1.61                |
| BZ (150 KHz, 0.5 μs)                 | 1500                  | 50                         | 1.92                |
| BZ-NO <sub>2</sub> (50 KHz, 0.5 μs)  | 180                   | 6                          | 0.15                |
| BZ-NO <sub>2</sub> (150 KHz, 0.5 μs) | 390                   | 13                         | 0.32                |
| BZ-NH <sub>2</sub> (50 KHz, 0.5 μs)  | 210                   | 7                          | 0.23                |
| BZ-NH <sub>2</sub> (50 KHz, 0.5 μs)  | 450                   | 15                         | 0.48                |

**Table S2.** SPP conditions for the conversion of palm oil to nanocarbon composite for 1  $\mu$ s and 40 min discharge.

| Frequency (kHz)    | Surface area (m <sup>2</sup> /g) | Pore volume (cm <sup>3</sup> /g) | Average pore diameter (nm) |
|--------------------|----------------------------------|----------------------------------|----------------------------|
| BZ                 | 220                              | 0.45                             | 20.0                       |
| BZ-NH <sub>2</sub> | 230                              | 0.49                             | 17.0                       |
| BZ-NO <sub>2</sub> | 222                              | 0.46                             | 15.0                       |

**Table S3.** The resistance ( $\Omega$ ), surface resistance ( $\Omega/\text{cm}^2$ ), resistivity ( $\Omega.\text{cm}$ ) and electrical conductivity (s/cm) tested by four-point probe in the different conditions for benzene.

| Conditions                     | Film thickness ( $\mu\text{m}$ ) | Resistance ( $\Omega$ ) | Surface resistance ( $\Omega/\text{cm}^2$ ) | Electrical conductivity (s/cm) | Resistivity ( $\Omega.\text{cm}$ ) |
|--------------------------------|----------------------------------|-------------------------|---------------------------------------------|--------------------------------|------------------------------------|
| Benzene (150 kHz, 0.5 $\mu$ s) | 88                               | $6.98 \times 10^3$      | $3.16 \times 10^4$                          | $3.59 \times 10^{-3}$          | 278.4                              |
| Benzene (100 kHz, 0.5 $\mu$ s) | 112                              | $7.89 \times 10^3$      | $3.57 \times 10^4$                          | $2.53 \times 10^{-3}$          | 395.9                              |
| Benzene (50 kHz, 0.5 $\mu$ s)  | 95                               | $9.88 \times 10^3$      | $4.48 \times 10^4$                          | $2.48 \times 10^{-3}$          | 403.0                              |

**Table S4.** The resistance ( $\Omega$ ), surface resistance ( $\Omega/\text{cm}^2$ ), resistivity ( $\Omega.\text{cm}$ ) and electrical conductivity ( $\text{s}/\text{cm}$ ) tested by four-point probe in the different conditions for Aniline.

| Conditions                            | Film thickness ( $\mu\text{m}$ ) | Resistance ( $\Omega$ ) | Surface resistance ( $\Omega/\text{cm}^2$ ) | Electrical conductivity ( $\text{s}/\text{cm}$ ) | Resistivity ( $\Omega.\text{cm}$ ) |
|---------------------------------------|----------------------------------|-------------------------|---------------------------------------------|--------------------------------------------------|------------------------------------|
| Aniline (150 kHz, 0.5 $\mu\text{s}$ ) | 70                               | $5.29 \times 10^4$      | $2.40 \times 10^5$                          | $6.61 \times 10^{-4}$                            | 1513                               |
| Aniline (100 kHz, 0.5 $\mu\text{s}$ ) | 76                               | $6.06 \times 10^4$      | $2.75 \times 10^5$                          | $5.78 \times 10^{-4}$                            | 1729                               |
| Aniline (50 kHz, 0.5 $\mu\text{s}$ )  | 63                               | $8.31 \times 10^4$      | $3.77 \times 10^5$                          | $4.22 \times 10^{-4}$                            | 2373                               |

**Table S5.** The resistance ( $\Omega$ ), surface resistance ( $\Omega/\text{cm}^2$ ), resistivity ( $\Omega.\text{cm}$ ) and electrical conductivity ( $\text{s}/\text{cm}$ ) tested by four-point probe in the different conditions for Nitro-benzene.

| Conditions                                  | Film thickness ( $\mu\text{m}$ ) | Resistance ( $\Omega$ ) | Surface resistance ( $\Omega/\text{cm}^2$ ) | Electrical conductivity ( $\text{s}/\text{cm}$ ) | Resistivity ( $\Omega.\text{cm}$ ) |
|---------------------------------------------|----------------------------------|-------------------------|---------------------------------------------|--------------------------------------------------|------------------------------------|
| Nitro-Benzene (150 kHz, 0.5 $\mu\text{s}$ ) | 181                              | $9.30 \times 10^3$      | $4.22 \times 10^4$                          | $2.14 \times 10^{-3}$                            | 467.8                              |
| Nitro-Benzene (100 kHz, 0.5 $\mu\text{s}$ ) | 170                              | $7.05 \times 10^3$      | $3.19 \times 10^4$                          | $1.72 \times 10^{-3}$                            | 577.4                              |
| Nitro-Benzene (50 kHz, 0.5 $\mu\text{s}$ )  | 164                              | $7.70 \times 10^3$      | $3.17 \times 10^4$                          | $1.73 \times 10^{-3}$                            | 581.4                              |
